# Supplementary material for: A Thermally Stable Hierarchical Heterostructure for Outstanding Impact Resistance in a High-Entropy Alloy
Source: Research Square preprint supplement (doi:10.21203/rs.3.rs-7797562/v1), 2025-10-15
Supplement: Supplementary file 1 [file c83bcfe19c5225a58c97118f.docx]

# A Thermally Stable Hierarchical Heterostructure for Outstanding Impact Resistance in a High-Entropy Alloy

Guowang Xu1,2,§, Guodong Li1,2,§, Peiwen Tang1,2, Qianyong Zhu1,2, Linbing Zhang3, Cheng Zhang2, Zezhou Li3, Yan Li1, Ruixiao Zheng1,2*, Chaoli Ma1,2, Shiteng Zhao1,2*，Hongbo Guo1,2*

1*School of Materials Science and Engineering, Key Laboratory of High-temperature Structural Materials & Coatings Technology (Ministry of Industry and Information Technology), Beihang University, 100191, Beijing, China*

2*Tianmushan Laboratory, Beihang University, Hangzhou, China.*

3*School of Materials Science and Engineering, National Key Laboratory of Science and Technology on Materials under Shock and Impact, Beijing Institute of Technology, Beijing, 100081, China*

**Supplementary note 1. Microstructure of Homo and HS alloy**

Supplementary Figures 1a-b revealed a typical core-shell harmonic structure in the sintered alloy (HS). Statistical analysis demonstrated that the average grain sizes of the coarse-grained core and ultra-fine-grained shell were 15.44 μm and 0.77 μm (Supplementary Figure 1c), respectively. The volume fraction of the three-dimensional UFG shell was quantified as 24%. Notably, annealing twins were observed within the core grains. Supplementary Figure 1d displays the bright field (BF) TEM image of the alloy, while the corresponding selected-area electron diffraction (SAED) pattern from the core region (Supplementary Figure 1e) exhibited distinct FCC diffraction spots along with L12 superlattice spots along the [011] zone axis. High angle annular dark field (HAADF) imaging (Supplementary Figure 1f) revealed dark-contrast L1₂-phase precipitates (average size: 28 nm, volume fraction: 60%) uniformly distributed within the light-contrast FCC matrix. To investigate elemental partitioning between the L1₂ phase and FCC matrix, EDS line scanning was conducted along the path indicated in Supplementary Figure 1g. The EDS results demonstrated Ni/Ti enrichment and Fe depletion in the L1₂ phase. Supplementary Figure 1h presents the inverse fast Fourier transform (IFFT) of the L1₂ diffraction pattern, revealing that the L1₂ phase comprises multiple coherent nanodomains.

**Supplementary note 2. Mechanical properties of Homo, HS and HSA alloy at all test strain rates**

Supplementary Figure 1a presents quasi-static compressive stress-strain responses of the three alloy variants (Homo, HS, HSA) at strain rates ranging from 10-4 to 10-1 s-1. Dynamic impact behavior under high-strain-rate loading is shown in Supplementary Figure 1b. Comparative analysis of flow stresses across all tested strain rates is summarized in Figure 2c.

**Supplementary note 3. Microstructure of quasi-static deformed HS alloy**

Supplementary Figure 3 presents TEM images of samples subjected to quasi-static plastic deformation at 6% and 30%. Supplementary Figure 3a shows BF image of the core-shell boundary region in the 6% deformed sample, revealing high-density dislocations near the core-shell interface in the core region, while the shell region exhibits lower dislocation density. Supplementary Figures 3b and 3c display magnified views of dislocation configurations in the core region of the 6% deformed sample, demonstrating high-density dislocation tangles (Supplementary Figure 3b) and dislocation walls formed through dislocation aggregation (Supplementary Figure 3c). Supplementary Figure 3d illustrates a BF image of the core region in the 30% deformed sample, where band-like deformation zones consisting of densely entangled dislocations are observed. Supplementary Figure 3e exhibits the core-shell boundary region of the 30% deformed sample, showing high-density dislocations generated in both coarse-grained core regions and fine-grained shell regions. Supplementary Figure 3f reveals the formation of deformation twins within certain grains. In summary, the primary deformation features after quasi-static plastic deformation consist of high-density dislocation structures. Notably, deformation twins may form in specific grains under higher plastic deformation conditions.

**Supplementary note 4. Microstructure of HS alloy deformed at high strain rates**

Supplementary Figure 4a presents a BF TEM image of HS alloy deformed at 1500 s-1, revealing distinct microstructural features across different regions. Acicular precipitates are predominantly distributed within the CG core region, while stacking fault network is concentrated at the core-shell interface. Supplementary Figure 4b displays the SAED pattern acquired from the core region, exhibiting superimposed diffraction spots from FCC [110] zone axis and α'-martensite [100] zone axis. The spatial coincidence of the FCC and BCC diffraction spots confirms the N-W orientation relationship between the two phases. Supplementary Figure 4c shows a DF image obtained using the martensite diffraction spot, demonstrating the BCC phase predominantly nucleates at the FCC/L12 phase interfaces. Supplementary Figure 4d provides a HRTEM image of the FCC-martensite interface, revealing rod-shaped martensite. A stacking fault network decorated with Lomer-Cottrell dislocation locks is observed at the core-shell boundary (Supplementary Figures 4e-f), indicative of restricted deformation due to the UFG structure.

Supplementary Figure 5a shows a DF TEM micrograph of HS alloy deformed at 5700 s-1, revealing intersecting deformation bands within core grains. The corresponding SAED pattern (Supplementary Figure 5b) confirms retention of γ-FCC matrix and γ'-L12 precipitate phases in the central core region. Atomic-resolution imaging (Supplementary Figure 5c) reveals stacking faults in this domain. Notably, Supplementary Figure 5d documents martensite transformation in an adjacent grain region proximal to the core-shell interface. The HRTEM image in Supplementary Figure 5e evidences extensive plastic deformation within the phase-transformed zone.

Results from Supplementary Figures 4-5 demonstrate a correlation between stacking fault deformation bands and BCC phase transformation. Notably, Supplementary Figure 5j reveals progressively increasing deformation band density approaching the core-shell interface, indicating enhanced plastic deformation at heterostructure boundaries. This localized strain concentration promotes both deformation band formation and BCC phase transformation.

**Supplementary note 5. Verify the martensitic transformation path through experimental data**

Table S1 presents experimental measurements of the shear angle *θ* , axial ratio , and intervector angle derived from SAED patterns, compared to theoretical predictions for the N-W transformation path. The measured shear angles of Martensite 1 and 3 () align closely with the theoretical energy-minimized value of 8.05°, while the axial ratio satisfies the condition for energy minimization (). Meanwhile, martensite with a shear angle deviating from the energy-minimized value (Martensite 2, θ = 6.06°) was also observed in the same sample. This angle is smaller than the energy-optimized value of 8.05°, indicating that this martensite variant exists in a metastable intermediate state. The axial ratio and intervector angle calculated based on this shear angle using Equations (2) and (3) agree closely with the experimentally measured values, further validating the plausibility of this transformation pathway.

**Supplementary note 6. Formation mechanism of the moiré patterns**

HRTEM analysis reveals distinct parallel Moiré fringes at martensite/FCC phase boundaries (Supplementary Figure 6a), accompanied by supplementary diffraction spots in FFT patterns (Supplementary Figure 6b). These interference patterns arise from the superposition of two misoriented lattices with dissimilar interplanar spacings (*d*1, *d*2) and mutual rotation angle *α*45. As shown in Supplementary Figure 6b, the plane spacing of two planes is *d*1 and *d*2, and two planes rotated at angle *α*. The Moiré fringe spacing (*d*m) is governed by the geometric relationship:

(1)

where the reciprocal space representation derives from the vector difference of diffraction vectors.

FFT patterns exhibit double diffraction spots (O1, O2) generated by dynamical scattering effects, corresponding to linear combinations of primary reflections:

(2)

This phenomenon originates from double diffraction at overlapping crystal domains, where transmitted beams from one lattice serve as incident beams for the adjacent lattice. The observed interfacial spacing difference of 0.07 Å and misorientation angle quantitatively account for the measured Moiré periodicity (), verifying the correctness of the model.

**Supplementary note 7. Possible mechanism of heterogeneous deformation induced strengthening in harmonic structure**

In previous studies1,2, high-resolution X-ray diffraction has revealed staged deformation behavior in heterostructured materials: the softer CG regions undergo plastic deformation first, while the harder UFG domains remain elastic until the flow stress increases sufficiently to initiate their yielding. This differential elastoplastic response between coarse and fine-grained areas leads to strain mismatch during deformation. To maintain material continuity, strain redistribution inevitably occurs at the interfaces between these regions.

This staged deformation behavior, where soft CG regions yield prior to the hard UFG domains, establishes a fundamental mechanical incompatibility at the core–shell interface. As a direct consequence of this strain mismatch, dislocation activity evolves in a spatially heterogeneous manner3,4. Specifically, Plastic deformation initiates in the CG core, where the core–shell interface acts as a barrier to dislocation motion, increasing dislocation density near the interface and enhancing strength in the core region through dislocation strengthening. Concurrently, stress concentration from accumulated dislocations promotes dislocation transmission across the interface and activates intragranular dislocations in the shell, reducing its strength compared to a homogeneous material of equivalent grain size. Despite the softening in the shell, the overall strength of the heterostructure exceeds the rule-of-mixtures prediction due to greater strengthening in the core. The increased dislocation density near the interface also raises the work-hardening rate in the core, which delays plastic instability in the shell. This synergy between core strengthening and shell deformation suppression enhances ductility by mitigating localized deformation.

In this work, high-strain-rate deformation also triggered the accumulation of high-density geometrically necessary dislocations (GNDs) near the core–shell interfaces, providing ample nucleation sites and driving force for martensitic transformation. The occurrence of phase transformation not only alleviated local stress concentration and suppressed crack initiation and propagation, but also interacted with the nano-sized L12 precipitates to refine the coarse grains into nanocrystalline domains. This resulted in a dynamic Hall-Petch effect, further enhancing the work-hardening capacity of the alloy.


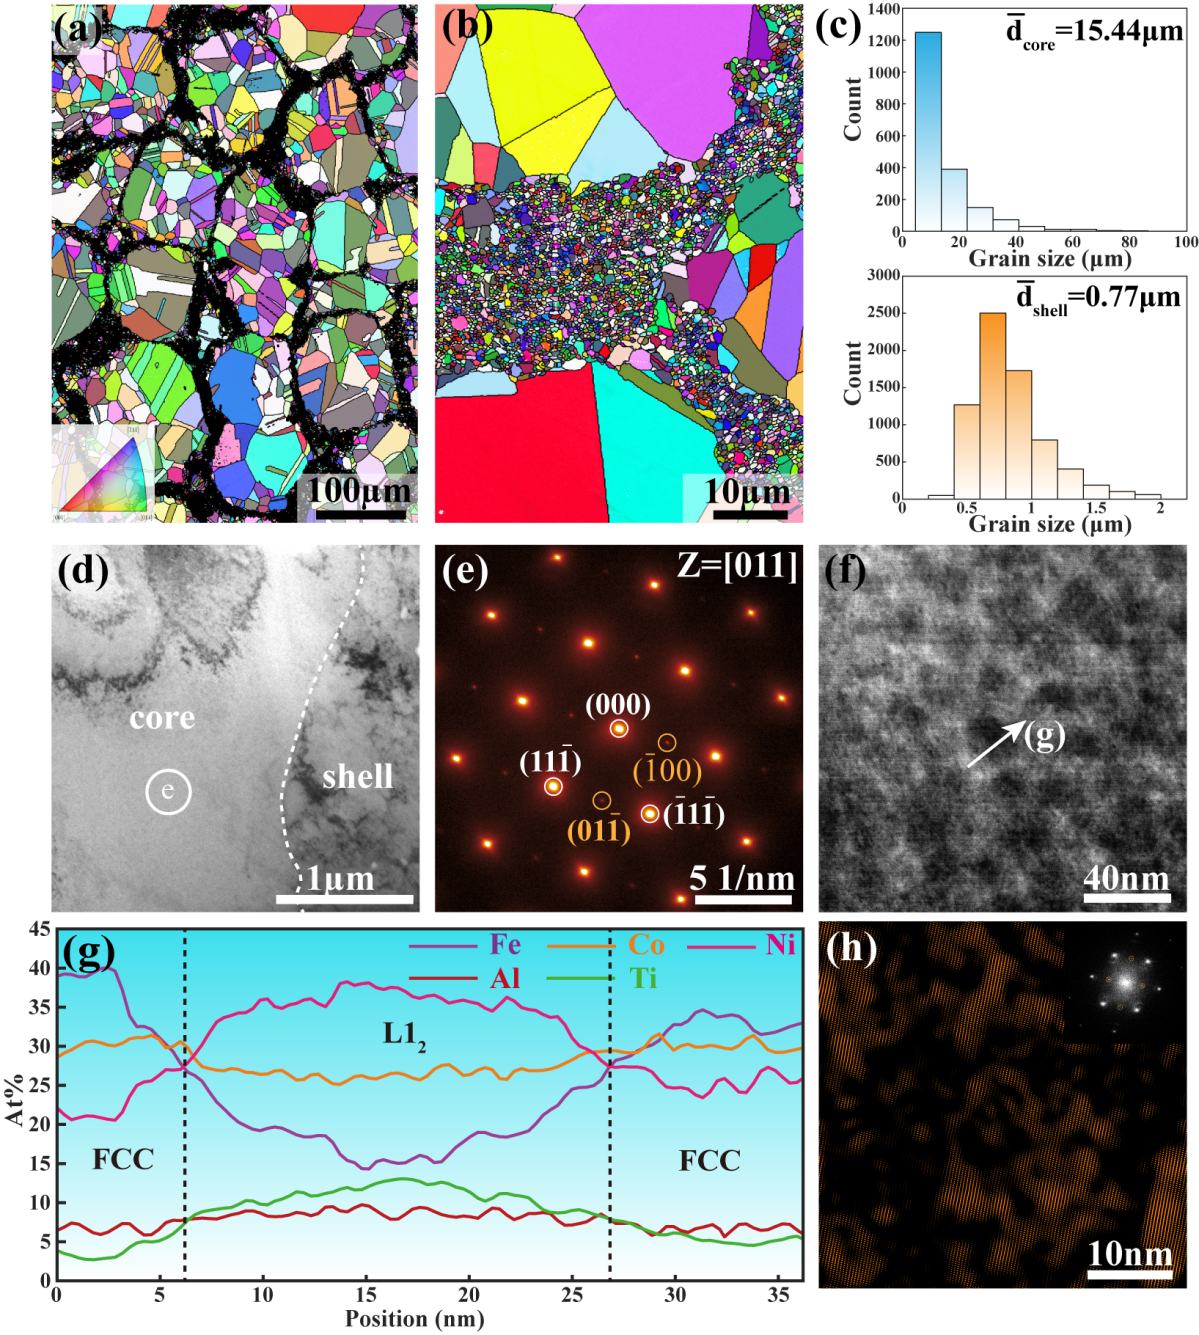


**Supplementary Figure 1|Microstructural characterization of sintered (HS) (FeCoNi)86Al7Ti7 high-entropy alloy:** **(a)** Low-magnification EBSD IPF map of HS alloy; **(b)** High-resolution IPF map of UFG shell region; **(c)** Grain size statistic of core and shell regions **(d)** TEM BF image of HS alloy contains CG core and UFG shell; **(e)** SAED pattern acquired along [110] zone axis; **(f)** STEM-HAADF image showing γ-FCC matrix and γ'-L12 precipitates; **(g)** EDS line profiles across matrix/precipitate interfaces; **(h)** IFFT image using L12 superlattice spots shows nano-scale L12 domain.


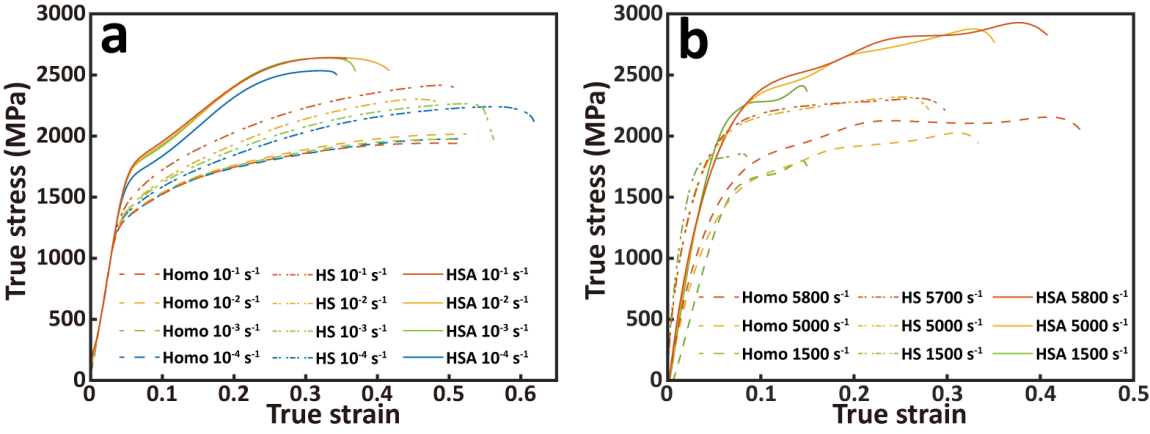


**Supplementary Figure 2|Mechanical properties of Homo, HS and HSA alloy:** **(a)** Quasi-static compressive true stress-strain curves; **(b)** Dynamic true stress-strain responses.


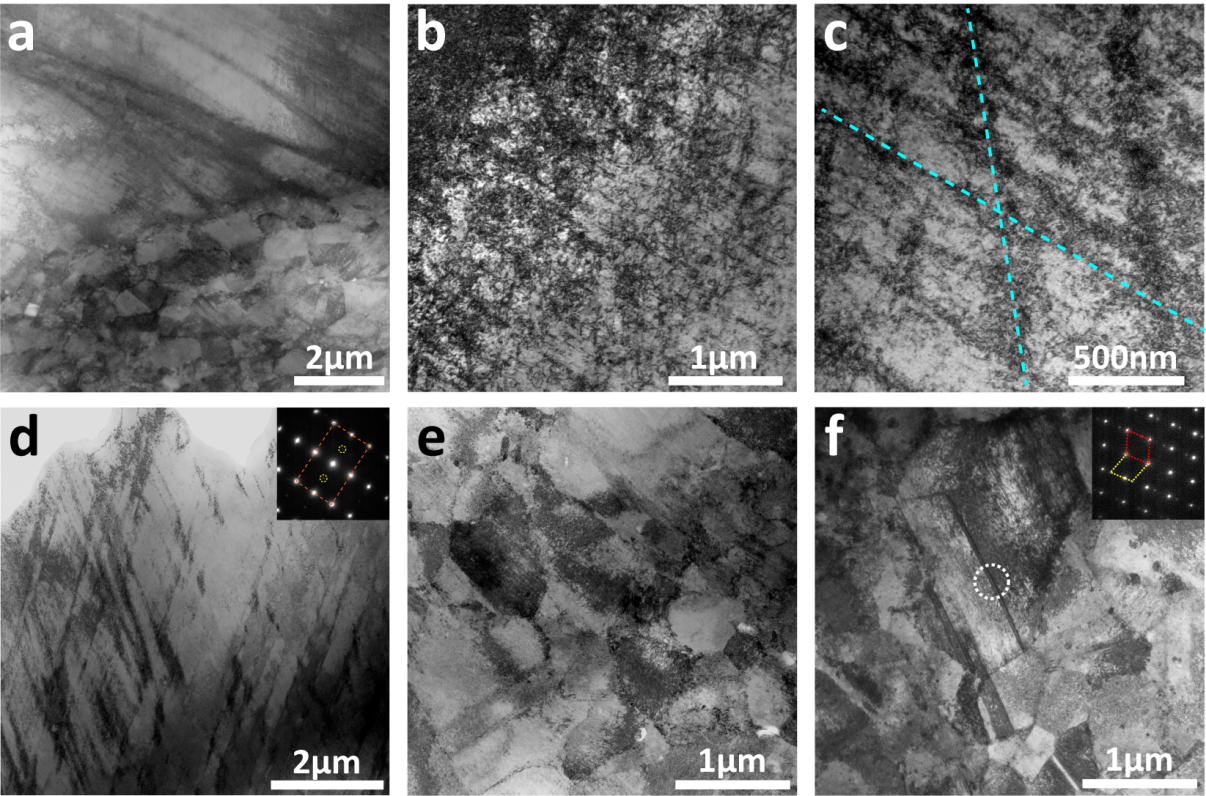


**Supplementary Figure 3|TEM images of quasi-static deformed HS sample at plastic deformation of 6% and 30%:** **(a)** BF image shows dislocation pile-up at core shell boundary; **(b)** Dislocation aggregation at core region; **(c)** Dislocation walls at core region; **(d)** Slip bands and high density of dislocation tangle at core region; **(e)** High density of dislocation in both core and shell grains; **(f)** Deformation twins formed in certain grains.


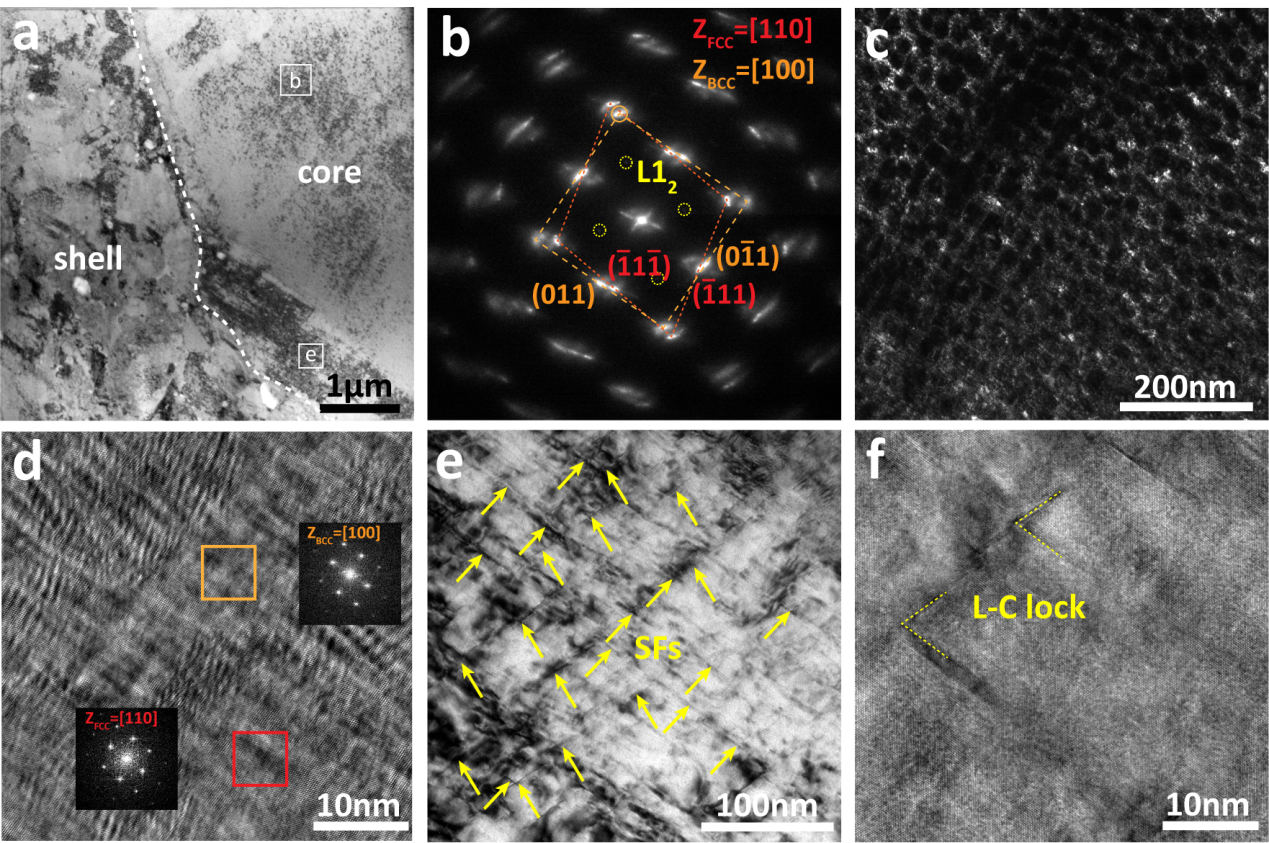


**Supplementary Figure 4|TEM images of HS sample deformed at 1500 s-1:** **(a)** BF image of sample deformed at 1500 s-1; **(b)** Selected electron diffraction patterns of FCC [110] zone and BCC [100] zone at core region; **(c)** DF image of core region using BCC spot; **(d)** HRTEM image of core region and IFFT images of FCC phase and BCC phase; **(e)** Stacking faults network at core-shell boundary; **(f)** HRTEM image shows Lomer-Cottrell dislocation locks in SFs network region.


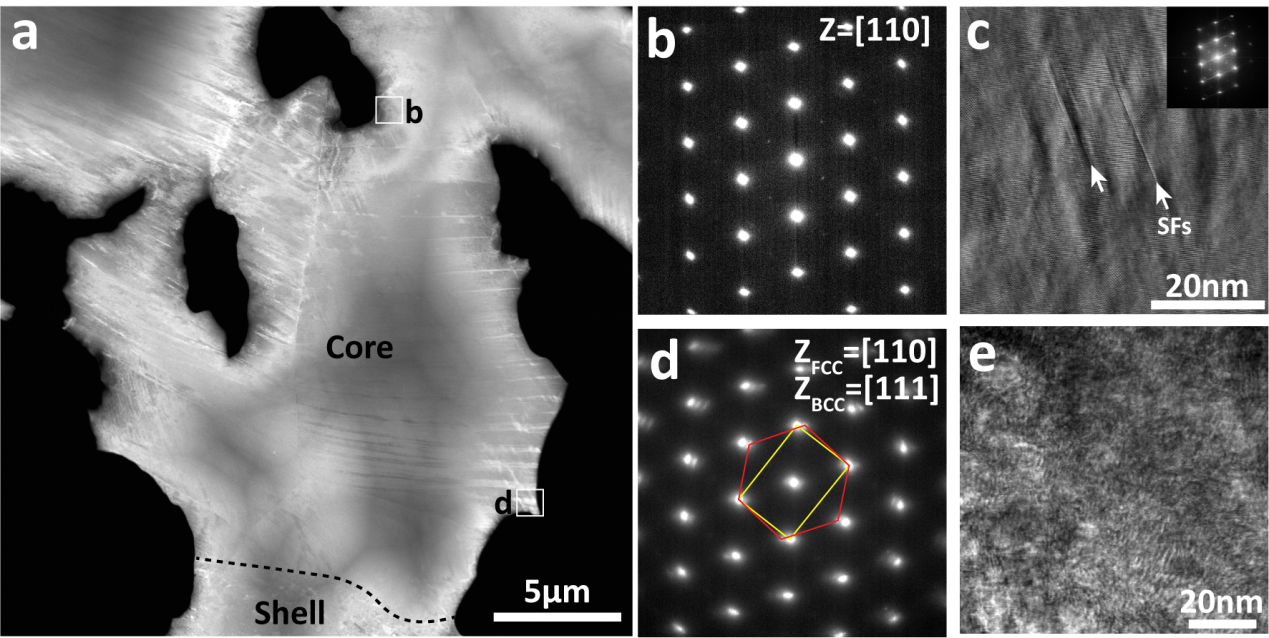


**Supplementary Figure 5|TEM images of HS alloy deformed at 5700 s-1: (a)** DF image shows deformation bands in core region; **(b)** SAED pattern of FCC [110] zone at inner core region; **(c)** HRTEM image shows SFs at inner core region; **(d)** SAED patterns of FCC [110] zone and martensite [111] zone obtained K-S orientation relationship at core region closed to core-shell boundary; **(e)** HRTEM image shows severe plastic deformation at core-shell boundary.


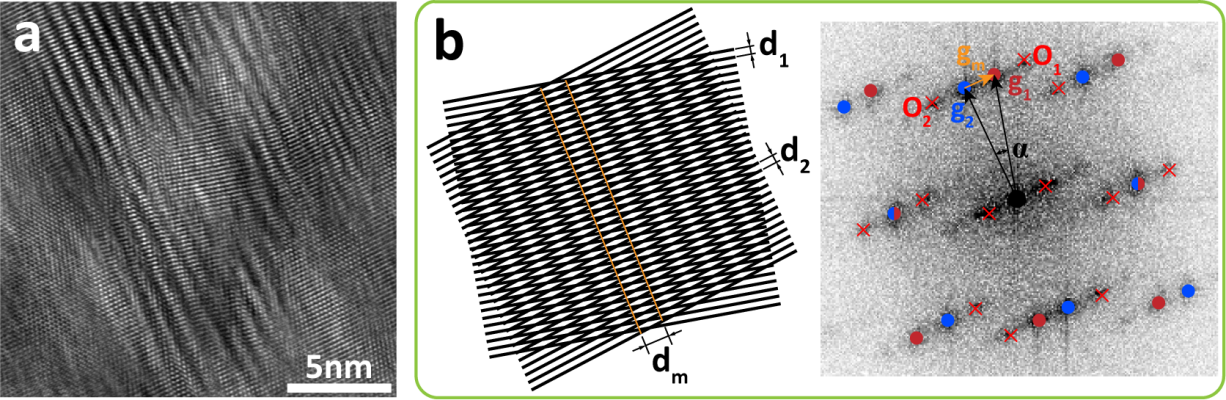


**Supplementary Figure 6|Formation mechanism of the moiré patterns: (a)** HRTEM image revealing moiré patterns around the martensite; **(b)** Schematic diagram depicting the formation mechanism of the moiré patterns.


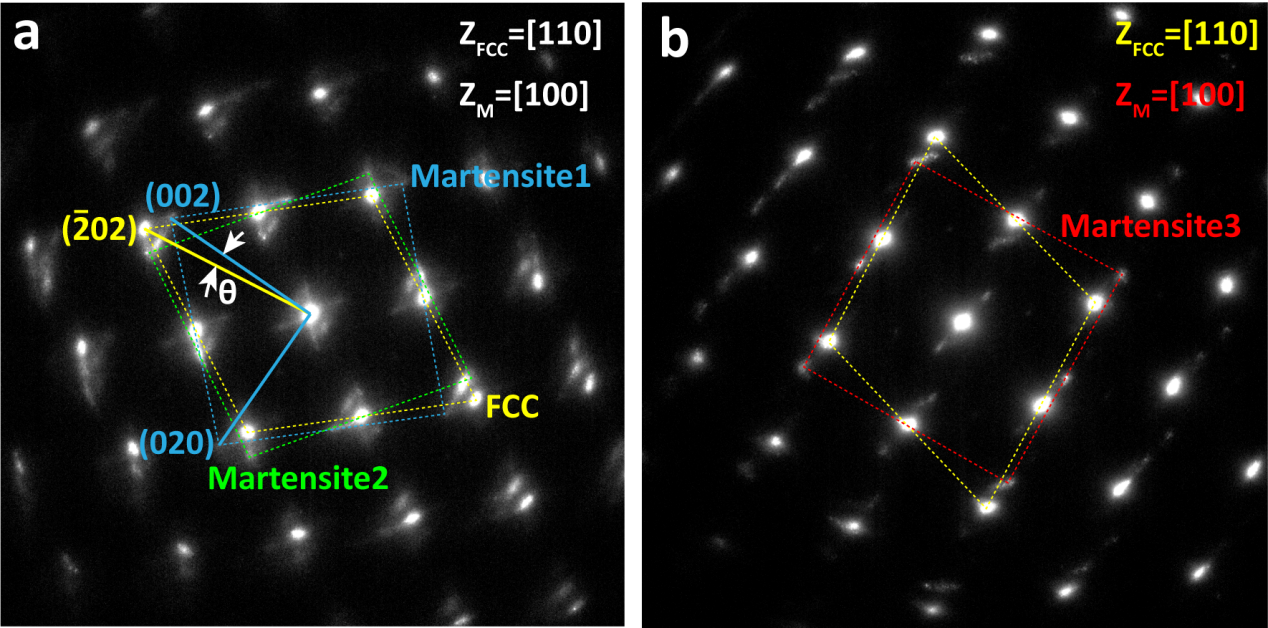


**Supplementary Figure 7|Martensite shear angle and lattice parameters measurement**


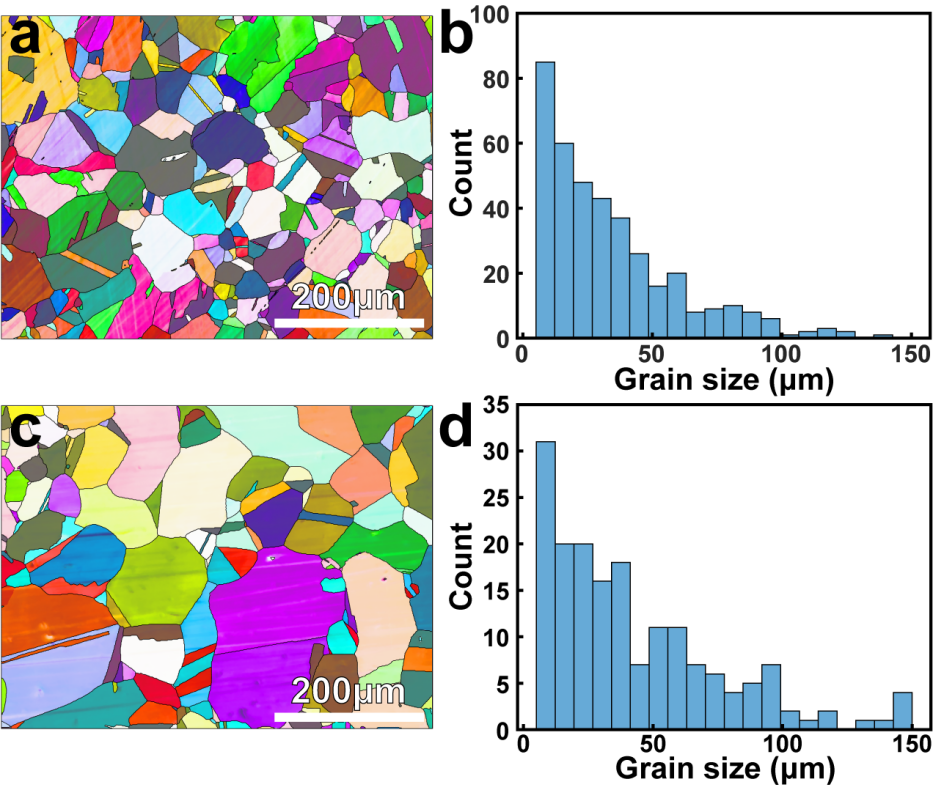


**Supplementary Figure 8|Microstructure and grain size statistic of Homo alloy before and after heating: (a)** EBSD IPF map of unheated Homo alloy; **(b)** Grain size statistic of unheated Homo alloy; **(c)** EBSD IPF map of 1000℃ heated Homo alloy; **(d)** Grain size statistic of 1000℃ heated Homo alloy

**Supplementary Table 1 Experimental and calculated parameters of the phase transition**

|  | *θ* |  |  |  |  |
| --- | --- | --- | --- | --- | --- |
| Martensite1 | 8.04° | 1.06 | 1.00 | 89.55° | 86.63° |
| Martensite2 | 6.06° | 1.14 | 1.08 | 87.51° | 86.78° |
| Martensite3 | 8.19° | 1.01 | 0.99 | 89.88° | 86.63° |

**Supplementary Table 2 Chemical composition of the FCC phase in the heterostructured alloys**

|  | Fe (at%) | Co | Ni | Al | Ti |
| --- | --- | --- | --- | --- | --- |
| HS (as-sintered) | 35.22 | 29.68 | 23.11 | 6.71 | 4.62 |
| HSA (aged) | 42.61 | 30.63 | 18.18 | 3.77 | 4.81 |

**References**

1. Sjögren-Levin, E. *et al.* Grain-level mechanism of plastic deformation in harmonic structure materials revealed by high resolution X-ray diffraction. *Acta Mater.* **265**, (2023).

2. Sjögren-Levin, E. *et al.* Stress partitioning in harmonic structure materials at the early stages of tensile loading studied in situ by synchrotron X-ray diffraction. *Scr. Mater.* **226**, (2023).

3. Shimokawa, T., Hasegawa, T., Kiyota, K., Niiyama, T. & Ameyama, K. Heterogeneous evolution of lattice defects leading to high strength and high ductility in harmonic structure materials through atomic and dislocation simulations. *Acta Mater.* **226**, (2022).

4. Zheng, X. *et al.* Revealing crack resistance in gradient nano-grained CoCrFeMnNi high-entropy alloys: A molecular dynamics study. *Int. J. Plast.* **191**, (2025).
